# Supplementary material for: Rapid Holocene bedrock canyon incision of Beida River, North Qilian Shan, China
Source: Copernicus journal article supplement (doi:10.5194/esurf-2021-48), 2021-07-12
Supplement: Supplementary file 2 [file esurf-2021-48-supplement.zip]

Archive with 3 entries (3 files):
- YiranWang_BDRiverKZ_Table S2.xlsx
- YiranWang_Supporting-Information_20210605.pdf
- YiranWang_BDRiverKZ_Table S1.xlsx
