# Supplementary material for: Rapid Holocene bedrock canyon incision of Beida River, North Qilian Shan, China
Source: Copernicus journal article supplement (doi:10.5194/esurf-2021-48), 2021-07-12
Supplement: Supplementary file 2 [file esurf-2021-48-supplement.zip › YiranWang_BDRiverKZ_Table S1.xlsx]

## Sheet: Sheet2
ID	Type	Northing	Easting	Elevation	Distance	Terrace		Coordinate System
1	Tread	4.38561e+06	415989	2100.71	2271.8	T1		WGS_1984_UTM_zone_47N
3	Tread	4.38539e+06	415998	2106.21	2470.65	T1
5	Strath	4.3854e+06	415782	2037.71	2515.78	T1
10	Strath	4.38525e+06	415839	2041.71	2549.44	T1
11	Tread	4.38527e+06	416010	2110.71	2491.62	T1
27	Tread	4.38501e+06	415751	2115.71	2977.35	T1
28	Tread	4.38499e+06	415742	2113.03	2999.8	T1
29	Tread	4.38499e+06	415737	2117.71	3004.58	T1
31	Tread	4.38496e+06	415705	2118.21	3040.32	T1
32	Strath	4.38501e+06	415724	2070.71	2991.51	T1
36	Tread	4.38492e+06	415669	2115.64	3086.28	T1
37	Strath	4.38488e+06	415631	2067.64	3138.28	T1
39	Tread	4.38464e+06	415543	2121.14	3396.83	T1
42	Strath	4.38467e+06	415449	2085.64	3403.85	T1
48	Strath	4.38439e+06	415184	2052.64	3750.13	T1
53	Strath	4.38431e+06	415252	2076.8	3811.12	T1
54	Strath	4.38425e+06	415384	2094.8	3833.64	T1
59	Strath	4.38403e+06	415250	2055.93	4079.77	T1
62	Strath	4.384e+06	415266	2073.93	4101.96	T1
72	Strath	4.3838e+06	415164	2078.93	4292.38	T1
77	Strath	4.38324e+06	414932	2057	4862.32	T1
82	Strath	4.38311e+06	414640	2076.9	5156.92	T1
87	Strath	4.38312e+06	414565	2074.17	5197.63	T1
96	Strath	4.38274e+06	414282	2089.84	5667	T1
106	Strath	4.38293e+06	414122	2072.84	5637.13	T1
109	Strath	4.38297e+06	414172	2081.17	5573.15	T1
112	Strath	4.38251e+06	413979	2123.84	6029.16	T1
113	Strath	4.38242e+06	413938	2119.84	6130.78	T1
115	Strath	4.3825e+06	414144	2099.84	6004.37	T1
128	Strath	4.38204e+06	413914	2111.17	6504.15	T1
130	Strath	4.38217e+06	414000	2111.17	6362.53	T1
134	Strath	4.38218e+06	413994	2101.66	6355.92	T1
138	Strath	4.38198e+06	413921	2114.66	6568.75	T1
140	Strath	4.38173e+06	413943	2127.66	6781.84	T1
144	Strath	4.38156e+06	413870	2096.97	6969.26	T1
158	Strath	4.38126e+06	413669	2112.87	7330.32	T1
160	Strath	4.38112e+06	413561	2101.41	7497.62	T1
168	Strath	4.38095e+06	413451	2096.41	7709.39	T1
171	Strath	4.38074e+06	413319	2148.41	7937.75	T1
173	Strath	4.38074e+06	413410	2105.41	7924.06	T1
181	Strath	4.38096e+06	413551	2141.41	7682.73	T1
187	Strath	4.38044e+06	413363	2126.41	8224.11	T1
189	Strath	4.38038e+06	413394	2105.83	8275.4	T1
200	Strath	4.3815e+06	413708	2107.85	7099.7	T1
202	Strath	4.38149e+06	413704	2108.97	7106.86	T1
205	Strath	4.38157e+06	413754	2118.97	7010.26	T1
210	Strath	4.3805e+06	413493	2111.88	8147.09	T1
214	Strath	4.38037e+06	413393	2122.88	8290.48	T1
218	Strath	4.38024e+06	413366	2115.88	8421.42	T1
225	Strath	4.38023e+06	413364	2111.97	8421.42	T1
230	Strath	4.3801e+06	413080	2124	8702.12	T1
232	Strath	4.38018e+06	413180	2122.97	8576.36	T1
233	Strath	4.38019e+06	413215	2120.97	8543.88	T1
242	Surface	4.37989e+06	413248	2205	8746.23	T1
255	Strath	4.37976e+06	412998	2123.86	9013.99	T1
259	Strath	4.37963e+06	412846	2126.86	9212.14	T1
262	Strath	4.3797e+06	412912	2126.07	9115.63	T1
269	Strath	4.37957e+06	412943	2173.07	9192.07	T1
275	Strath	4.37941e+06	412653	2140.68	9504.99	T1
278	Strath	4.37945e+06	412537	2131.68	9547.3	T1
281	Strath	4.37938e+06	412618	2136.68	9549.17	T1
285	Strath	4.37946e+06	412538	2149.51	9540.88	T1
289	Strath	4.37711e+06	411070	2192.21	12394.2	T1
292	Strath	4.377e+06	411085	2205.86	12497.4	T1
302	Strath	4.37669e+06	411204	2198.86	12819.1	T1
306	Strath	4.37661e+06	411095	2211.19	12892.2	T1
314	Strath	4.37739e+06	411138	2177.71	12131.4	T1
316	Strath	4.37737e+06	410986	2185.71	12173.1	T1
321	Tread	4.38433e+06	415465	2125.43	3735.12	T1
322	Strath	4.38429e+06	415467	2110.43	3766.35	T1
324	Strath	4.38258e+06	414132	2083.17	5930.08	T1
326	Strath	4.3824e+06	413935	2114.17	6146.89	T1
353	Strath	4.37772e+06	411284	2171.91	11770.7	T1
355	Strath	4.37776e+06	411250	2202.91	11744.4	T1
358	Strath	4.37761e+06	411228	2184.91	11901.9	T1
362	Strath	4.37813e+06	411435	2186.17	11348.1	T1
363	Strath	4.37806e+06	411468	2161.17	11394.1	T1
365	Strath	4.37817e+06	411553	2179.77	11244.6	T1
367	Strath	4.37826e+06	411550	2160.77	11196.8	T1
371	Strath	4.37838e+06	411656	2168.86	11039.3	T1
380	Strath	4.37744e+06	411181	2192.81	12072.2	T1
384	Strath	4.37744e+06	411178	2170.41	12078.9	T1
401	Tread	4.3825e+06	414179	2157.63	6003.92	T1
402	Tread	4.3824e+06	414177	2158.63	6099.52	T1
424	Tread	4.38568e+06	416058	2101.58	2179.64	T1
425	Tread	4.3857e+06	416047	2094.58	2163.52	T1
426	Tread	4.38576e+06	416113	2101.58	2081.41	T1
427	Tread	4.38579e+06	416084	2093.58	2070.22	T1
428	Tread	4.38583e+06	416125	2099.58	1944.08	T1
429	Tread	4.3859e+06	416170	2098.58	1862.35	T1
430	Tread	4.38593e+06	416232	2096.08	1797.07	T1
432	Tread	4.38616e+06	416345	2090.08	1622.44	T1
433	Tread	4.38586e+06	415873	2096.58	2091.51	T1
434	Tread	4.38591e+06	415877	2094.58	2046.11	T1
435	Tread	4.386e+06	415852	2092.08	2033.68	T1
443	Tread	4.38638e+06	415797	2085.19	1520.2	T1
444	Tread	4.38632e+06	415893	2085.69	1553.87	T1
445	Tread	4.38627e+06	415891	2087.19	1608.09	T1
446	Tread	4.38618e+06	415835	2088.69	1939.43	T1
447	Tread	4.38614e+06	415829	2090.69	1971.03	T1
448	Tread	4.38607e+06	415822	2092.69	2021.76	T1
449	Tread	4.38597e+06	415861	2093.69	2033.68	T1
461	Tread	4.38688e+06	415566	2081.21	716.162	T1
462	Tread	4.38645e+06	415671	2084.21	1474.2	T1
463	Tread	4.38665e+06	415582	2083.21	1297.58	T1
464	Tread	4.37079e+06	412227	2350.23	19575.9	T1
465	Tread	4.37076e+06	412292	2352.23	19648.7	T1
466	Tread	4.37069e+06	412348	2353.23	19730.7	T1
469	Tread	4.37086e+06	412378	2343.23	19673.8	T1
470	Strath	4.37079e+06	412473	2327.23	19788.6	T1
471	Strath	4.37079e+06	412389	2337.23	19716.2	T1
472	Tread	4.37077e+06	412478	2348.23	19800.9	T1
473	Tread	4.37072e+06	412511	2348.23	19858.6	T1
474	Strath	4.3707e+06	412505	2330.23	19861.3	T1
475	Tread	4.3711e+06	412318	2343.23	19498.6	T1
478	Tread	4.37095e+06	412069	2343.39	19361.5	T1
479	Tread	4.37089e+06	412167	2344.39	19475.1	T1
480	Surface	4.37113e+06	412243	2346.39	19129.3	T1
481	Tread	4.37112e+06	412237	2342.39	19137.7	T1
485	Strath	4.37111e+06	412098	2308.39	19148	T1
491	Strath	4.37115e+06	412071	2311.52	19109.9	T1
492	Surface	4.37117e+06	412218	2345.52	19085.6	T1
495	Strath	4.37121e+06	412068	2303.52	19050.3	T1
504	Strath	4.37166e+06	411981	2308.11	18599.8	T1
506	Strath	4.37157e+06	411986	2306.11	18694.9	T1
508	Strath	4.37145e+06	412009	2294.11	18810.4	T1
510	Strath	4.37133e+06	412062	2307.11	18935.3	T1
517	Strath	4.3718e+06	412146	2291.97	18457.8	T1
519	Strath	4.37173e+06	412065	2302.97	18535.3	T1
520	Strath	4.37185e+06	412106	2312.97	18409.4	T1
523	Strath	4.37189e+06	412153	2296.97	18367.2	T1
526	Strath	4.37194e+06	412124	2296.97	18352	T1
527	Strath	4.37201e+06	412098	2306.97	18308	T1
531	Strath	4.37206e+06	412012	2284.05	18220	T1
534	Strath	4.37201e+06	412015	2297.05	18265	T1
536	Strath	4.37207e+06	411984	2285.25	18193.7	T1
537	Strath	4.37214e+06	411863	2296.25	18079.9	T1
539	Strath	4.3722e+06	411709	2279.25	17946.8	T1
545	Strath	4.37224e+06	411756	2303.5	17937	T1
546	Strath	4.37228e+06	411744	2298.5	17898.3	T1
552	Strath	4.37266e+06	411628	2272.57	17504.2	T1
553	Strath	4.37239e+06	411733	2290.57	17794.8	T1
554	Strath	4.37245e+06	411728	2294.57	17743	T1
560	Strath	4.3728e+06	411526	2286.14	17359.2	T1
563	Strath	4.37261e+06	411621	2289.83	17550.2	T1
566	Strath	4.37255e+06	411706	2272.83	17645.1	T1
576	Strath	4.37278e+06	411022	2268.38	16893.3	T1
583	Tread	4.37262e+06	411461	2324.78	17459.3	T1
587	Strath	4.37281e+06	411246	2279.78	17091.9	T1
588	Strath	4.37274e+06	411192	2264.78	17066.8	T1
590	Tread	4.37264e+06	411189	2322.78	17100.4	T1
591	Tread	4.37267e+06	411149	2323.78	17052.6	T1
601	Strath	4.37366e+06	410538	2272.18	15948	T1
602	Strath	4.37377e+06	410577	2270.18	15873.9	T1
604	Strath	4.37379e+06	410612	2250.18	15835.6	T1
612	Strath	4.37335e+06	410587	2251.44	16256.5	T1
614	Strath	4.37352e+06	410569	2257.44	16089.4	T1
616	Strath	4.37325e+06	410671	2265.78	16384.2	T1
619	Strath	4.37318e+06	410716	2267.98	16464.7	T1
620	Strath	4.37311e+06	410762	2268.98	16545.7	T1
621	Strath	4.37309e+06	410791	2265.98	16576.8	T1
631	Strath	4.37294e+06	410862	2286.18	16724.7	T1
634	Strath	4.37388e+06	410663	2250.13	15739.8	T1
640	Strath	4.37401e+06	410867	2242.13	15529.2	T1
641	Tread	4.3739e+06	410853	2297.13	15631.5	T1
642	Tread	4.37393e+06	410912	2298.13	15575.5	T1
647	Strath	4.37402e+06	410886	2255.1	15509	T1
651	Strath	4.37414e+06	410915	2258.1	15388.7	T1
658	Strath	4.3762e+06	411119	2226.49	13322.7	T1
660	Strath	4.37611e+06	411096	2224.49	13412.2	T1
662	Strath	4.37605e+06	410952	2195.49	13538.3	T1
663	Strath	4.37601e+06	410864	2212.49	13587.4	T1
671	Strath	4.37602e+06	410896	2211.17	13587.4	T1
677	Strath	4.37588e+06	410895	2235.3	13693.7	T1
680	Strath	4.3757e+06	410896	2213.8	13873.6	T1
681	Strath	4.37562e+06	410913	2211.8	13948.5	T1
686	Strath	4.37565e+06	410912	2218.86	13925.3	T1
705	Strath	4.3764e+06	411150	2203.26	13130.6	T1
707	Surface	4.37642e+06	411229	2223.76	13080.3	T1
708	Strath	4.3764e+06	411232	2219.76	13096.5	T1
731	Tread	4.37486e+06	410908	2286.45	14713.3	T1
750	Tread	4.37453e+06	410735	2283.26	15059.5	T1
754	Strath	4.37438e+06	410724	2266.26	15217.5	T1
755	Strath	4.37422e+06	410655	2266.26	15439.9	T1
758	Strath	4.37438e+06	410757	2248.26	15206.3	T1
763	Strath	4.37426e+06	410851	2236	15317.3	T1
767	Strath	4.37413e+06	410914	2256	15397.2	T1
781	Strath	4.37876e+06	412225	2147.53	10303.7	T1
783	Strath	4.3788e+06	412255	2159.63	10249.8	T1
787	Strath	4.37902e+06	412283	2138.63	10035	T1
804	Strath	4.37901e+06	412285	2137.68	10039	T1
806	Strath	4.37894e+06	412295	2169.68	10111.8	T1
809	Strath	4.37936e+06	412413	2136.68	9704.12	T1
811	Strath	4.3794e+06	412537	2130.68	9591.09	T1
814	Strath	4.37925e+06	412498	2153.68	9727.72	T1
820	Strath	4.37863e+06	412175	2151.53	10469.7	T1
822	Strath	4.37851e+06	412076	2152.53	10618.9	T1
825	Strath	4.37852e+06	412134	2215.61	10563.6	T1
826	Strath	4.37869e+06	412167	2150.61	10382.2	T1
843	Surface	4.37074e+06	412518	2356.89	19853.3	T1
844	Tread	4.37075e+06	412476	2348.89	19813.1	T1
845	Strath	4.37072e+06	412494	2339.89	19842.1	T1
846	Strath	4.3707e+06	412512	2331.89	19869.2	T1
847	Strath	4.37068e+06	412616	2324.89	19968.3	T1
848	Tread	4.37072e+06	412605	2341.89	19937.8	T1
851	Tread	4.3705e+06	412678	2351.01	20112.4	T1
859	Strath	4.37074e+06	413048	2321.97	20307.6	T1
866	Strath	4.37063e+06	413296	2329.65	20576.7	T1
867	Strath	4.37058e+06	413380	2333.65	20676.6	T1
869	Strath	4.37042e+06	413643	2329.65	20983.1	T1
873	Tread	4.37075e+06	413040	2360.65	20297.5	T1
875	Strath	4.37021e+06	413961	2328.12	21364.2	T1
876	Strath	4.37019e+06	413998	2330.12	21406.4	T1
879	Strath	4.37039e+06	413701	2336.12	21049.7	T1
885	Tread	4.36968e+06	414201	2366.76	21842.9	T1
895	Tread	4.36967e+06	414173	2366.78	21819.6	T1
911	Tread	4.36918e+06	415056	2382.93	22832.9	T1
912	Tread	4.36928e+06	415223	2380.93	22925	T1
913	Tread	4.36916e+06	415392	2380.93	23128.7	T1
925	Tread	4.36916e+06	415425	2381	23161.1	T1
928	Tread	4.36909e+06	415587	2385	23332.5	T1
936	Tread	4.36897e+06	415716	2387.95	23505.9	T1
952	Tread	4.36828e+06	416005	2399.32	24188.1	T1
959	Tread	4.3679e+06	415892	2377.79	24585.4	T1
995	Tread	4.36691e+06	415419	2433.06	25602.4	T1
999	Tread	4.36683e+06	415491	2431.95	25691.6	T1
1000	Tread	4.36689e+06	415452	2428.95	25630.2	T1
1004	Tread	4.36672e+06	415723	2429.95	25849.3	T1
1014	Tread	4.36644e+06	415891	2432.08	26159.8	T1
1015	Tread	4.36637e+06	415898	2434.08	26226.4	T1
1019	Tread	4.36631e+06	415905	2433.33	26284.9	T1
1031	Tread	4.36549e+06	416065	2441.23	27151.9	T1
1032	Surface	4.36546e+06	416074	2444.23	27184.4	T1
1038	Tread	4.36531e+06	416076	2445.89	27319.9	T1
1039	Tread	4.36524e+06	416131	2448.89	27410.6	T1
1067	Tread	4.36385e+06	415904	2469.76	28844.5	T1
1098	Tread	4.36279e+06	415529	2483.81	29991	T1
1105	Tread	4.36277e+06	415494	2483.46	30113.1	T1
1115	Tread	4.36263e+06	415311	2486.33	30202.4	T1
1119	Tread	4.36255e+06	415315	2489.67	30276.7	T1
1122	Surface	4.36256e+06	415526	2512.67	30320.2	T1
1124	Surface	4.36245e+06	415467	2499.67	30412.9	T1
1126	Surface	4.36234e+06	415459	2508.85	30518.1	T1
1139	Tread	4.36184e+06	415637	2497.64	31060.9	T1
1141	Tread	4.3617e+06	415525	2496.64	31237.8	T1
1144	Tread	4.36183e+06	415604	2491.9	31093.6	T1
1146	Tread	4.36167e+06	415507	2491.9	31274.2	T1
1170	Tread	4.36106e+06	415020	2512.81	31967.3	T1
1182	Tread	4.36102e+06	414845	2514.37	32145.6	T1
1203	Tread	4.36077e+06	413752	2533.24	33343.7	T1
1240	Surface	4.35947e+06	412850	2569.3	34960	T1
1242	Tread	4.3595e+06	412826	2558.3	34949.1	T1
1243	Surface	4.3595e+06	412870	2565.86	34921.3	T1
1269	Surface	4.35884e+06	411617	2582.25	36378.6	T1
1270	Tread	4.35885e+06	411595	2579.51	36388	T1
1330	Tread	4.35635e+06	410025	2632.81	39385.9	T1
1331	Tread	4.35632e+06	409997	2626.81	39425.9	T1
1343	Tread	4.35619e+06	409898	2627.36	39587.4	T1
1344	Tread	4.3561e+06	410290	2629.36	39455	T1
1348	Surface	4.35567e+06	409520	2652.54	40232.4	T1
1349	Surface	4.35566e+06	409418	2643.18	40336	T1
1350	Tread	4.35569e+06	409408	2634.18	40340.6	T1
1359	Tread	4.35569e+06	409024	2645.77	40692.8	T1
1360	Surface	4.35573e+06	409027	2652.77	40650.5	T1
1362	Tread	4.35566e+06	409015	2640.57	40721.1	T1
1368	Tread	4.35517e+06	408975	2650.72	41214.8	T1
1369	Tread	4.35515e+06	408967	2654.22	41241.5	T1
1387	Surface	4.35331e+06	408475	2666.46	43005.2	T1
1390	Surface	4.3531e+06	408554	2669.16	43226	T1
1394	Tread	4.35326e+06	408766	2669	43173.2	T1
1395	Tread	4.35315e+06	408823	2672	43298	T1
1396	Tread	4.35309e+06	408908	2662.79	43385.9	T1
1397	Tread	4.35281e+06	408792	2669.79	43591.5	T1
1404	Tread	4.35264e+06	408812	2677.1	43989.8	T1
1405	Tread	4.35279e+06	408793	2671.6	43610.4	T1
1406	Tread	4.35227e+06	408810	2683.11	44346.3	T1
1407	Tread	4.3523e+06	408904	2685.11	44314.4	T1
1414	Tread	4.35128e+06	408787	2688.07	45339.4	T1
1415	Tread	4.35104e+06	408546	2703.07	45588.5	T1
G01	Tread	4.38643e+06	415744	2082.35	1482.67	T1
G02	Tread	4.38636e+06	415826	2084.63	1529.47	T1
G03	Tread	4.38534e+06	416033	2107.14	2491.62	T1
G04	Tread	4.38528e+06	416020	2108.78	2491.62	T1
G05	Tread	4.38332e+06	415085	2140.15	4701.78	T1
G06	Tread	4.38389e+06	415446	2143.67	4163.05	T1
G07	Tread	4.38321e+06	415002	2144.55	4834.4	T1
G09	Tread	4.38316e+06	415228	2152.5	4719.74	T1
G16	Tread	4.38006e+06	412956	2203.17	8820.13	T1
G17	Tread	4.37991e+06	413255	2205.49	8731.33	T1
G20	Tread	4.37969e+06	412747	2220.98	9228.89	T1
G22	Tread	4.37827e+06	411698	2228.17	11066.2	T1
G26	Tread	4.37687e+06	411270	2253.45	12640.6	T1
G31	Tread	4.37486e+06	410928	2290.88	14707.8	T1
G32	Tread	4.37391e+06	410855	2292.97	15622.3	T1
G33	Tread	4.37325e+06	410659	2297.75	16378.5	T1
G44	Tread	4.36916e+06	415090	2388.25	22872.1	T1
2	Tread	4.38553e+06	415848	2080.71	2404.68	T1'
6	Tread	4.38533e+06	415897	2082.71	2491.62	T1'
7	Tread	4.38529e+06	415903	2088.21	2491.62	T1'
8	Tread	4.38525e+06	415884	2080.21	2513.51	T1'
20	Surface	4.38545e+06	415853	2180.03	2470.12	T1'
41	Surface	4.38454e+06	415420	2110.64	3541.89	T1'
46	Surface	4.38444e+06	415276	2114.14	3679.29	T1'
47	Surface	4.38435e+06	415284	2116.64	3755.67	T1'
51	Surface	4.38435e+06	415291	2118.8	3753.41	T1'
55	Surface	4.38421e+06	415402	2127.8	3860.38	T1'
58	Tread	4.38408e+06	415298	2111.93	4013.5	T1'
63	Tread	4.38403e+06	415327	2116.93	4060.49	T1'
64	Tread	4.38396e+06	415314	2113.93	4124.57	T1'
70	Tread	4.3838e+06	415239	2122.93	4281.88	T1'
71	Surface	4.38378e+06	415230	2124	4281.88	T1'
73	Surface	4.38375e+06	415175	2127	4323.37	T1'
74	Surface	4.38375e+06	415215	2122	4295.69	T1'
76	Tread	4.3834e+06	415072	2131	4652.8	T1'
94	Tread	4.38295e+06	414540	2132.67	5338.58	T1'
95	Surface	4.3828e+06	414367	2132.17	5567.26	T1'
108	Tread	4.38294e+06	414128	2136.84	5622.14	T1'
111	Tread	4.38252e+06	413968	2131.84	6026.2	T1'
114	Tread	4.38241e+06	413921	2131.84	6142.17	T1'
116	Tread	4.38272e+06	414294	2132.34	5674.24	T1'
117	Tread	4.3827e+06	414270	2133.84	5707.02	T1'
129	Tread	4.38203e+06	413905	2134.17	6531.95	T1'
137	Tread	4.38198e+06	413900	2136.66	6582.99	T1'
141	Tread	4.38164e+06	413904	2143.66	6884.77	T1'
142	Tread	4.38163e+06	413908	2140.97	6891.39	T1'
153	Tread	4.38111e+06	413683	2150.87	7454.42	T1'
169	Tread	4.381e+06	413443	2150.41	7659.55	T1'
170	Tread	4.38093e+06	413429	2151.41	7729.17	T1'
172	Tread	4.38074e+06	413313	2156.41	7931.05	T1'
174	Tread	4.38073e+06	413500	2153.41	7912.21	T1'
175	Surface	4.38076e+06	413520	2155.41	7882.67	T1'
176	Tread	4.38051e+06	413540	2158.41	8128.74	T1'
177	Surface	4.38048e+06	413549	2158.83	8158.35	T1'
180	Tread	4.38097e+06	413690	2178.41	7575.46	T1'
182	Surface	4.38097e+06	413603	2151.71	7665.88	T1'
183	Tread	4.38099e+06	413618	2148.71	7591.98	T1'
186	Surface	4.38043e+06	413356	2171.41	8229.89	T1'
190	Tread	4.3804e+06	413370	2161.83	8257.99	T1'
191	Tread	4.38106e+06	413745	2174.87	7470.01	T1'
197	Tread	4.38153e+06	413922	2146.97	6974.06	T1'
198	Tread	4.3815e+06	413916	2145.97	7005.05	T1'
206	Surface	4.38156e+06	413678	2150.97	7053.28	T1'
207	Tread	4.38149e+06	413627	2144.97	7138.08	T1'
211	Tread	4.38049e+06	413544	2161.88	8141.79	T1'
215	Tread	4.38039e+06	413361	2161.88	8269.88	T1'
219	Tread	4.38028e+06	413337	2165.88	8382.6	T1'
226	Tread	4.38028e+06	413329	2164.97	8390.35	T1'
227	Tread	4.38026e+06	413266	2165.97	8462.97	T1'
228	Tread	4.38021e+06	413206	2164.97	8534.36	T1'
229	Tread	4.3802e+06	413175	2167.97	8568.95	T1'
231	Tread	4.38012e+06	413075	2171	8692.06	T1'
243	Surface	4.37995e+06	413270	2186	8690.71	T1'
244	Surface	4.37994e+06	413235	2187	8718.04	T1'
245	Tread	4.38002e+06	412976	2173	8836.33	T1'
246	Strath	4.38001e+06	412984	2171	8834.77	T1'
251	Tread	4.37991e+06	412964	2172.86	8920.38	T1'
252	Strath	4.37991e+06	412971	2138.86	8921.74	T1'
253	Tread	4.37981e+06	412982	2171.86	8985.34	T1'
254	Tread	4.37978e+06	412987	2170	9006.53	T1'
257	Tread	4.37977e+06	412954	2173.86	9031.93	T1'
258	Tread	4.37966e+06	412831	2179.77	9200.48	T1'
261	Tread	4.37972e+06	412900	2175.07	9110.07	T1'
267	Tread	4.37965e+06	412818	2175.07	9213.49	T1'
270	Tread	4.37955e+06	412953	2181.07	9199.08	T1'
271	Surface	4.37956e+06	412904	2187.68	9226.12	T1'
272	Tread	4.37954e+06	412885	2178.68	9250.97	T1'
276	Tread	4.37939e+06	412660	2179.68	9512.04	T1'
277	Tread	4.37947e+06	412514	2198.68	9551.27	T1'
282	Tread	4.37936e+06	412633	2178.68	9553.02	T1'
284	Tread	4.37939e+06	412652	2180.51	9517.61	T1'
290	Tread	4.37711e+06	411054	2222.21	12387.8	T1'
293	Tread	4.37701e+06	411060	2224.86	12491.3	T1'
299	Strath	4.37678e+06	411202	2200.86	12724.7	T1'
300	Tread	4.37683e+06	411220	2225.86	12673.1	T1'
307	Tread	4.37661e+06	411068	2244.19	12885.9	T1'
311	Surface	4.37659e+06	411191	2224.19	12910.7	T1'
313	Tread	4.37742e+06	411106	2208.71	12121.7	T1'
318	Tread	4.38446e+06	415365	2111.43	3633.47	T1'
319	Tread	4.38436e+06	415331	2108.43	3741.62	T1'
320	Strath	4.38434e+06	415332	2094.43	3753.17	T1'
323	Tread	4.38262e+06	414185	2131.17	5880.42	T1'
325	Tread	4.38251e+06	413962	2133.17	6033.51	T1'
332	Tread	4.38051e+06	413612	2181.33	8114.75	T1'
352	Tread	4.37796e+06	411448	2221.91	11492.7	T1'
356	Tread	4.37778e+06	411236	2212.91	11737.3	T1'
359	Tread	4.37761e+06	411211	2213.81	11899.7	T1'
361	Tread	4.37814e+06	411426	2196.17	11348.1	T1'
368	Surface	4.37827e+06	411545	2168.77	11195.2	T1'
369	Surface	4.37833e+06	411598	2169.77	11114.1	T1'
370	Strath	4.37832e+06	411599	2155.77	11119.4	T1'
386	Tread	4.37744e+06	411132	2207.41	12092.9	T1'
422	Tread	4.38564e+06	415938	2076.58	2268.09	T1'
436	Tread	4.386e+06	415921	2081.58	1989.19	T1'
518	Tread	4.37174e+06	412106	2315.97	18519.1	T1'
524	Tread	4.3719e+06	412161	2310.97	18364.4	T1'
528	Tread	4.37201e+06	412105	2310.97	18307.6	T1'
529	Tread	4.37206e+06	412033	2312.05	18227.2	T1'
530	Tread	4.37207e+06	412012	2312.05	18212.3	T1'
535	Tread	4.37209e+06	411986	2306.25	18181.9	T1'
540	Tread	4.3722e+06	411702	2317.25	17944.6	T1'
547	Tread	4.37225e+06	411762	2307.5	17928.9	T1'
548	Tread	4.37241e+06	411659	2314.57	17737.2	T1'
551	Tread	4.37248e+06	411646	2309.57	17672.4	T1'
557	Tread	4.37269e+06	411596	2302.14	17465.5	T1'
558	Tread	4.37267e+06	411518	2301.14	17444.1	T1'
561	Tread	4.37281e+06	411530	2301.14	17358	T1'
562	Tread	4.37263e+06	411609	2307.83	17525.3	T1'
564	Tread	4.37256e+06	411619	2309.33	17587.9	T1'
567	Tread	4.3726e+06	411720	2300.83	17608	T1'
570	Strath	4.37286e+06	410994	2261.38	16841.9	T1'
584	Tread	4.37266e+06	411420	2297.78	17308	T1'
585	Tread	4.37266e+06	411402	2296.78	17290.7	T1'
603	Tread	4.37378e+06	410562	2289.18	15874.7	T1'
609	Tread	4.37325e+06	410587	2298.44	16343.6	T1'
638	Tread	4.37405e+06	410859	2280.13	15491.6	T1'
648	Tread	4.3741e+06	410896	2276.1	15436.1	T1'
649	Tread	4.37412e+06	410904	2278.1	15410.4	T1'
650	Tread	4.37416e+06	410906	2277.1	15371.7	T1'
656	Tread	4.37642e+06	411232	2223.49	13080.3	T1'
657	Tread	4.37621e+06	411116	2232.99	13313.2	T1'
661	Tread	4.3761e+06	411095	2233.49	13421.8	T1'
664	Tread	4.37604e+06	410889	2247.49	13579.8	T1'
665	Tread	4.376e+06	410854	2250.49	13587.4	T1'
670	Tread	4.37589e+06	410842	2246.17	13681.6	T1'
672	Tread	4.37605e+06	410874	2242.67	13571.8	T1'
678	Tread	4.37582e+06	410893	2244.3	13750.2	T1'
679	Tread	4.37573e+06	410877	2245.3	13845.4	T1'
682	Surface	4.37562e+06	410904	2244.8	13957.5	T1'
687	Tread	4.3756e+06	410902	2245.86	13969.4	T1'
695	Tread	4.37555e+06	410954	2245.61	14019.6	T1'
696	Strath	4.37551e+06	410917	2235.61	14059.6	T1'
715	Strath	4.3752e+06	410980	2236.51	14365.6	T1'
719	Strath	4.37518e+06	411044	2237.45	14382.8	T1'
720	Tread	4.37519e+06	411066	2260.45	14374.5	T1'
723	Strath	4.37498e+06	410976	2237.45	14593.8	T1'
725	Strath	4.37497e+06	410911	2236.45	14607.6	T1'
726	Strath	4.37492e+06	410954	2237.45	14651.7	T1'
727	Tread	4.3749e+06	410951	2259.45	14663.5	T1'
728	Strath	4.37492e+06	410887	2243.45	14649.4	T1'
729	Strath	4.37492e+06	410859	2250.45	14663.6	T1'
732	Strath	4.37487e+06	410756	2248.31	14727	T1'
735	Strath	4.37477e+06	410767	2253.31	14824.1	T1'
737	Strath	4.37472e+06	410856	2242.31	14855	T1'
738	Tread	4.37472e+06	410812	2271.31	14868.8	T1'
739	Surface	4.37472e+06	410795	2273.31	14870.8	T1'
740	Tread	4.37468e+06	410871	2272.31	14894.2	T1'
742	Strath	4.37465e+06	410882	2250.31	14925.6	T1'
745	Tread	4.37462e+06	410877	2270.26	14958.2	T1'
746	Strath	4.37461e+06	410883	2241.26	14965.1	T1'
752	Strath	4.37448e+06	410768	2251.26	15104.4	T1'
753	Tread	4.3744e+06	410731	2279.26	15187.3	T1'
757	Strath	4.37442e+06	410755	2249.26	15167.4	T1'
766	Surface	4.37413e+06	410909	2281	15397.8	T1'
789	Strath	4.37904e+06	412376	2190.63	9988.4	T1'
790	Tread	4.379e+06	412265	2187.63	10060	T1'
791	Tread	4.37882e+06	412237	2190.63	10242.8	T1'
792	Tread	4.37878e+06	412204	2191.53	10290.4	T1'
793	Tread	4.37905e+06	412380	2201.63	9975.97	T1'
803	Tread	4.37899e+06	412266	2183.68	10067.3	T1'
805	Tread	4.37894e+06	412281	2186.68	10112.9	T1'
810	Tread	4.37939e+06	412403	2200.68	9683.46	T1'
812	Tread	4.37945e+06	412490	2199.68	9586.04	T1'
815	Tread	4.37923e+06	412503	2184.68	9737.05	T1'
816	Surface	4.37922e+06	412465	2187.68	9766.72	T1'
817	Tread	4.3792e+06	412425	2186.18	9812.9	T1'
818	Tread	4.37917e+06	412369	2184.68	9863.97	T1'
821	Tread	4.37853e+06	412186	2194.53	10516.3	T1'
823	Tread	4.37871e+06	412175	2186.53	10366.1	T1'
824	Tread	4.37875e+06	412192	2186.53	10323.4	T1'
849	Tread	4.3707e+06	412636	2330.89	19975.4	T1'
868	Tread	4.37042e+06	413662	2335.65	21000.4	T1'
870	Tread	4.37058e+06	413225	2335.65	20545.3	T1'
871	Tread	4.37049e+06	413324	2338.65	20675.7	T1'
878	Tread	4.37039e+06	413713	2338.12	21060.1	T1'
881	Tread	4.37031e+06	413846	2339.12	21213.4	T1'
882	Tread	4.37017e+06	414070	2345.12	21482	T1'
886	Tread	4.3701e+06	414138	2342.76	21573.4	T1'
887	Tread	4.36998e+06	414220	2349.76	21703.4	T1'
889	Tread	4.36959e+06	414616	2351.76	22243.7	T1'
890	Tread	4.36981e+06	414522	2346.76	22052.5	T1'
892	Tread	4.36957e+06	414618	2353.76	22253.1	T1'
896	Tread	4.36983e+06	414496	2356.78	22018	T1'
910	Tread	4.36952e+06	414663	2350.65	22320.8	T1'
914	Tread	4.3691e+06	415414	2365.93	23179	T1'
926	Tread	4.36909e+06	415436	2364	23205.3	T1'
927	Tread	4.36904e+06	415547	2363	23327.7	T1'
937	Tread	4.36891e+06	415698	2366.95	23518.8	T1'
939	Tread	4.36875e+06	415649	2378.95	23558	T1'
940	Tread	4.3687e+06	415742	2377.45	23665.4	T1'
943	Tread	4.36877e+06	415908	2361.68	23774.2	T1'
950	Tread	4.36823e+06	415962	2374.32	24244.8	T1'
958	Tread	4.36808e+06	415960	2375.79	24389.9	T1'
974	Tread	4.36768e+06	415816	2390.8	24812.9	T1'
975	Tread	4.36756e+06	415788	2390.8	24941.6	T1'
985	Tread	4.36734e+06	415733	2404.85	25168.4	T1'
992	Tread	4.36702e+06	415578	2395.06	25510.3	T1'
1002	Tread	4.36683e+06	415693	2409.95	25731.9	T1'
1018	Tread	4.36632e+06	415867	2403.33	26272.1	T1'
1023	Tread	4.36603e+06	416001	2424.33	26582.1	T1'
1024	Surface	4.36602e+06	416018	2429.33	26597.1	T1'
1025	Tread	4.36596e+06	415931	2425.63	26662.2	T1'
1028	Tread	4.36552e+06	415879	2428.23	27058.7	T1'
1040	Tread	4.36515e+06	416092	2427.89	27475.8	T1'
1045	Tread	4.36509e+06	416128	2435.89	27546.5	T1'
1046	Tread	4.36496e+06	416172	2434.49	27683.7	T1'
1047	Tread	4.36491e+06	416204	2434.89	27742.1	T1'
1048	Tread	4.36465e+06	416215	2436.89	27968.8	T1'
1052	Surface	4.36447e+06	415846	2462.64	28284.5	T1'
1053	Surface	4.36436e+06	415821	2465.64	28343.8	T1'
1054	Surface	4.36435e+06	415819	2463.94	28357.7	T1'
1055	Surface	4.36434e+06	415817	2465.94	28367.6	T1'
1062	Tread	4.36431e+06	415819	2455.82	28397.9	T1'
1063	Tread	4.36427e+06	415819	2456.32	28440	T1'
1064	Tread	4.36423e+06	415814	2457.32	28477.6	T1'
1065	Surface	4.36426e+06	415811	2471.32	28449.7	T1'
1068	Tread	4.36422e+06	415814	2452.76	28485.4	T1'
1069	Tread	4.36369e+06	415810	2459.76	29011.7	T1'
1070	Tread	4.36373e+06	415731	2459.76	28979.8	T1'
1074	Surface	4.36423e+06	415806	2467.76	28477.1	T1'
1080	Surface	4.36361e+06	415789	2462.04	29098.8	T1'
1081	Tread	4.3636e+06	415809	2460.04	29097.8	T1'
1099	Tread	4.3628e+06	415506	2477.81	29997.3	T1'
1106	Tread	4.36278e+06	415485	2478.46	30021.3	T1'
1113	Tread	4.36277e+06	415457	2477.33	30099.5	T1'
1120	Surface	4.36254e+06	415279	2502.67	30279.4	T1'
1148	Surface	4.36154e+06	415267	2495.9	31527	T1'
1155	Surface	4.36144e+06	415224	2510.68	31635.3	T1'
1156	Tread	4.36155e+06	415245	2499.68	31539.3	T1'
1162	Tread	4.36156e+06	415232	2493.61	31540.4	T1'
1163	Tread	4.36142e+06	415210	2495.11	31658.2	T1'
1164	Surface	4.36106e+06	415104	2515.61	31883.2	T1'
1165	Surface	4.36157e+06	415250	2495.61	31522.1	T1'
1166	Surface	4.36138e+06	415246	2517.61	31662.6	T1'
1169	Surface	4.3612e+06	415149	2526.81	31820.4	T1'
1174	Surface	4.36104e+06	415003	2524.81	31986.4	T1'
1175	Surface	4.36104e+06	415022	2519.81	31967.4	T1'
1181	Surface	4.36101e+06	414848	2530.37	32144.1	T1'
1183	Surface	4.36106e+06	415127	2524.37	31859.9	T1'
1211	Tread	4.36041e+06	412909	2538.53	34172	T1'
1220	Tread	4.36041e+06	413329	2522.44	33897	T1'
1236	Tread	4.35989e+06	413099	2539.86	34492	T1'
1238	Surface	4.35982e+06	412899	2549.86	34632.3	T1'
1267	Tread	4.35859e+06	411652	2567.25	36480.9	T1'
1277	Tread	4.35869e+06	411894	2559.66	36200.8	T1'
1280	Tread	4.359e+06	412365	2556.24	35623.2	T1'
1284	Tread	4.35864e+06	411643	2559.91	36463.5	T1'
1286	Tread	4.35868e+06	411867	2557.91	36231	T1'
1290	Tread	4.35889e+06	412255	2554.91	35795.9	T1'
1292	Tread	4.35819e+06	411264	2566.81	37029.3	T1'
1294	Tread	4.35835e+06	411271	2580.31	36930.4	T1'
1295	Tread	4.35839e+06	411089	2582.81	37059.7	T1'
1298	Tread	4.35833e+06	411003	2581.81	37165.1	T1'
1301	Tread	4.35838e+06	411208	2581.64	36966.9	T1'
1303	Tread	4.35832e+06	410979	2581.64	37165.1	T1'
1317	Tread	4.35678e+06	410409	2602.9	38810.4	T1'
1334	Tread	4.35622e+06	410198	2613.81	39403.9	T1'
1335	Tread	4.35619e+06	410146	2614.37	39454.4	T1'
1336	Tread	4.35617e+06	410120	2614.81	39485.9	T1'
1376	Surface	4.35483e+06	408847	2648.11	41567.3	T1'
1403	Tread	4.35252e+06	408929	2664.6	43992.1	T1'
G08	Tread	4.38266e+06	414339	2150.43	5693.04	T1'
G12	Tread	4.38018e+06	413142	2168.51	8599.99	T1'
G13	Tread	4.38049e+06	413612	2184.55	8133.14	T1'
G15	Tread	4.37868e+06	412039	2202.05	10555.9	T1'
G19	Tread	4.37767e+06	411231	2217.4	11838.4	T1'
G23	Tread	4.37565e+06	410903	2243.68	13924.6	T1'
G24	Tread	4.37596e+06	410842	2246.39	13615.4	T1'
13	Tread	4.38545e+06	415672	2090.71	2581.51	T1''
15	Tread	4.38557e+06	415678	2086.71	2441.57	T1''
40	Surface	4.38467e+06	415535	2104.14	3368.33	T1''
75	Surface	4.38361e+06	415060	2111	4498.74	T1''
88	Tread	4.3831e+06	414591	2123.17	5195.28	T1''
89	Tread	4.38311e+06	414619	2119.9	5167.9	T1''
92	Tread	4.38295e+06	414447	2128.17	5400.13	T1''
93	Tread	4.38297e+06	414493	2126.17	5357.4	T1''
131	Tread	4.38224e+06	414028	2116.17	6284.52	T1''
132	Tread	4.3823e+06	414065	2120.17	6224.31	T1''
133	Tread	4.38219e+06	414008	2119.66	6343.1	T1''
143	Tread	4.38156e+06	413913	2131.97	6949.95	T1''
154	Surface	4.38105e+06	413580	2128.87	7554	T1''
155	Tread	4.38115e+06	413600	2122.87	7461.1	T1''
156	Surface	4.38117e+06	413636	2131.87	7425.02	T1''
157	Surface	4.38117e+06	413660	2134.87	7408.52	T1''
159	Tread	4.38112e+06	413597	2137.41	7482.36	T1''
199	Tread	4.38147e+06	413879	2128.97	7046.51	T1''
201	Tread	4.38151e+06	413701	2124.85	7092.59	T1''
203	Tread	4.3815e+06	413697	2116.97	7098.85	T1''
204	Tread	4.38152e+06	413707	2120.97	7080.87	T1''
240	Surface	4.37996e+06	413190	2168	8731.49	T1''
241	Surface	4.37992e+06	413164	2167	8782.25	T1''
309	Tread	4.37655e+06	411172	2205.19	12949.6	T1''
310	Surface	4.37657e+06	411180	2216.19	12930.5	T1''
312	Tread	4.37746e+06	411165	2192.71	12063.8	T1''
381	Tread	4.37746e+06	411167	2202.81	12057.6	T1''
385	Tread	4.37745e+06	411163	2190.41	12068.3	T1''
423	Tread	4.38576e+06	415801	2077.58	2211.46	T1''
482	Tread	4.37114e+06	412152	2333.39	19119.6	T1''
493	Tread	4.3712e+06	412122	2331.52	19057.5	T1''
505	Tread	4.37158e+06	412005	2315.11	18683.1	T1''
509	Tread	4.37132e+06	412081	2323.11	18936.7	T1''
511	Strath	4.37119e+06	412064	2303.11	19073.5	T1''
513	Surface	4.37118e+06	412138	2318.11	19080.2	T1''
574	Tread	4.37276e+06	411135	2278.38	17006.9	T1''
575	Tread	4.37278e+06	411068	2277.38	16936.9	T1''
586	Tread	4.37282e+06	411280	2291.78	17122.7	T1''
589	Tread	4.37277e+06	411123	2286.78	16993.8	T1''
598	Tread	4.37368e+06	410595	2263.18	15958.5	T1''
605	Tread	4.3738e+06	410609	2271.18	15831.2	T1''
610	Tread	4.3733e+06	410610	2278.44	16312.7	T1''
611	Tread	4.37334e+06	410575	2276.44	16264	T1''
613	Tread	4.37353e+06	410561	2271.44	16082	T1''
622	Tread	4.37314e+06	410838	2282.58	16545.1	T1''
623	Tread	4.37316e+06	410828	2282.28	16527.5	T1''
628	Tread	4.3729e+06	410964	2284.18	16798.6	T1''
629	Tread	4.37297e+06	410844	2278.18	16701.2	T1''
632	Tread	4.37385e+06	410639	2267.13	15770.7	T1''
633	Tread	4.37388e+06	410658	2268.13	15735.1	T1''
639	Tread	4.37401e+06	410851	2265.13	15532.8	T1''
646	Tread	4.37404e+06	410880	2266.1	15498.2	T1''
652	Tread	4.37419e+06	410896	2262.1	15349.2	T1''
706	Tread	4.37642e+06	411221	2199.26	13085.3	T1''
733	Tread	4.37481e+06	410817	2247.31	14773.4	T1''
756	Tread	4.37443e+06	410745	2259.26	15160.7	T1''
764	Tread	4.37425e+06	410851	2262	15326.5	T1''
765	Tread	4.3742e+06	410893	2264	15344.4	T1''
891	Tread	4.36974e+06	414496	2336.76	22066	T1''
897	Tread	4.36974e+06	414487	2343.78	22055.8	T1''
903	Surface	4.36981e+06	414551	2357.69	22074.4	T1''
949	Tread	4.36832e+06	415925	2367.32	24162.4	T1''
951	Tread	4.36823e+06	415931	2367.32	24255	T1''
953	Tread	4.36813e+06	415963	2362.82	24345.5	T1''
984	Tread	4.36712e+06	415638	2394.85	25394.1	T1''
1001	Tread	4.36699e+06	415584	2386.95	25539.5	T1''
1003	Tread	4.36677e+06	415662	2397.95	25785.9	T1''
1005	Tread	4.3667e+06	415701	2384.91	25859.4	T1''
1006	Tread	4.36654e+06	415718	2397.91	26024.8	T1''
1007	Tread	4.36648e+06	415854	2400.91	26106.8	T1''
1013	Tread	4.36641e+06	415847	2406.08	26173.2	T1''
1030	Tread	4.36555e+06	416033	2414.23	27085.9	T1''
1033	Surface	4.36557e+06	416050	2420.23	27072.9	T1''
1072	Surface	4.36368e+06	415742	2476.76	29034.9	T1''
1073	Surface	4.36373e+06	415709	2477.76	28990.2	T1''
1121	Surface	4.36255e+06	415467	2470.67	30314.7	T1''
1140	Tread	4.36178e+06	415644	2482.14	31100.1	T1''
1147	Tread	4.36161e+06	415290	2480.9	31462.5	T1''
1153	Tread	4.36162e+06	415227	2484.68	31497.7	T1''
1187	Tread	4.36106e+06	414592	2498.32	32453.1	T1''
1188	Tread	4.36103e+06	414488	2503.15	32552.6	T1''
1210	Tread	4.36027e+06	413014	2522.53	34212.2	T1''
1215	Tread	4.36035e+06	413211	2526.53	34019.5	T1''
1232	Tread	4.36016e+06	412990	2521.41	34306.8	T1''
1235	Tread	4.35996e+06	413087	2526.06	34432.6	T1''
1237	Tread	4.35992e+06	412976	2525.36	34506.5	T1''
1241	Tread	4.35964e+06	412934	2529.3	34787.4	T1''
1250	Tread	4.35928e+06	412598	2540.45	35259	T1''
1255	Tread	4.35818e+06	411285	2569.72	37015.1	T1''
1268	Tread	4.35868e+06	411638	2559.25	36445.9	T1''
1271	Tread	4.35881e+06	411789	2553.25	36259.6	T1''
1275	Tread	4.35868e+06	411665	2555.66	36420.3	T1''
1278	Tread	4.35881e+06	411799	2553.66	36251	T1''
1281	Tread	4.3592e+06	412560	2541.24	35343.6	T1''
1287	Tread	4.35881e+06	411847	2550.51	36206.6	T1''
1289	Tread	4.35877e+06	412090	2542.91	35990	T1''
1304	Tread	4.35823e+06	410901	2580.64	37276.6	T1''
1305	Tread	4.35809e+06	410880	2574.61	37400.9	T1''
1332	Tread	4.35625e+06	410148	2590.37	39398.6	T1''
1333	Tread	4.35627e+06	410161	2593.31	39375.5	T1''
1337	Tread	4.35611e+06	410051	2592.31	39569.5	T1''
1342	Tread	4.35595e+06	410049	2599.36	39707.5	T1''
1351	Tread	4.35592e+06	409437	2608.18	40278.1	T1''
1408	Tread	4.35246e+06	408828	2660.11	44109.9	T1''
483	Tread	4.37114e+06	412112	2323.39	19120.9	T1'''
494	Tread	4.37123e+06	412080	2321.52	19034.8	T1'''
507	Tread	4.37146e+06	412017	2307.11	18796	T1'''
512	Tread	4.37116e+06	412085	2318.11	19104	T1'''
525	Tread	4.37195e+06	412132	2300.97	18352	T1'''
858	Tread	4.37066e+06	413048	2322.97	20348.6	T1'''
888	Tread	4.36994e+06	414222	2338.76	21725.8	T1'''
902	Surface	4.36978e+06	414552	2348.69	22093.9	T1'''
1214	Tread	4.36036e+06	413201	2524.53	34017.7	T1'''
1219	Tread	4.36047e+06	413353	2513.94	33841.7	T1'''
484	Tread	4.3711e+06	412138	2315.39	19158.7	T1''''
490	Tread	4.3711e+06	412154	2309.52	19164.4	T1''''
854	Tread	4.37059e+06	412783	2317.01	20155.8	T1*
855	Tread	4.37061e+06	412773	2319.89	20140.8	T1*
857	Tread	4.37064e+06	412856	2313.97	20195.8	T1*
872	Tread	4.37053e+06	413334	2325.65	20662.8	T1*
938	Tread	4.36877e+06	415881	2360.95	23747.4	T1*
1285	Tread	4.35871e+06	411719	2544.91	36359.3	T1*
1327	Tread	4.35641e+06	410292	2588.87	39187.2	T1*
1328	Tread	4.35635e+06	410211	2591.37	39287.1	T1*
4	Tread	4.3854e+06	415826	2070.71	2491.62	T1'*
9	Tread	4.38524e+06	415858	2073.71	2540.48	T1'*
107	Tread	4.38298e+06	414148	2121.17	5583.69	T1'*
298	Tread	4.37678e+06	411136	2213.86	12720.1	T1'*
308	Tread	4.37651e+06	411108	2219.19	12989.9	T1'*
431	Tread	4.38591e+06	416065	2074.58	1933.12	T1'*
437	Tread	4.38604e+06	416015	2073.58	1892.04	T1'*
438	Tread	4.38612e+06	416171	2069.08	1691.95	T1'*
630	Tread	4.37293e+06	410815	2294.18	16724.7	T1'*
703	Tread	4.37641e+06	411142	2218.26	13133.8	T1'*
704	Tread	4.37635e+06	411139	2217.26	13180.9	T1'*
751	Tread	4.37451e+06	410766	2265.26	15082.6	T1'*
759	Tread	4.37438e+06	410784	2263.26	15205.4	T1'*
12	River Channel	4.38534e+06	415740	1979.71	2586.19
33	River Channel	4.38523e+06	415507	1981.71	2851.84
38	River Channel	4.38483e+06	415496	1983.64	3231.84
49	River Channel	4.38436e+06	415048	1990.64	3807.98
56	River Channel	4.38426e+06	415150	1995.93	3878.86
60	River Channel	4.38402e+06	415148	2000.93	4109.67
61	River Channel	4.38398e+06	415172	1998.93	4142.55
78	River Channel	4.38343e+06	414801	2013	4812.31
81	River Channel	4.3832e+06	414750	2022.9	5012.08
90	River Channel	4.38308e+06	414442	2026.17	5308.48
91	River Channel	4.38309e+06	414358	2028.17	5359.91
105	River Channel	4.38278e+06	414146	2033.84	5730.09
110	River Channel	4.3826e+06	414014	2030.84	5933.87
118	River Channel	4.38255e+06	414048	2035.63	5978.22
127	River Channel	4.38213e+06	413885	2036.17	6424.78
136	River Channel	4.38175e+06	413859	2043.66	6801.02
139	River Channel	4.38191e+06	413950	2038.66	6623.76
151	River Channel	4.38146e+06	413760	2044.87	7104.18
165	River Channel	4.38062e+06	413303	2049.41	8053.57
166	River Channel	4.38085e+06	413373	2046.41	7819.84
167	River Channel	4.38098e+06	413476	2044.41	7672.51
188	River Channel	4.38037e+06	413417	2055.83	8283.05
193	River Channel	4.38136e+06	413668	2041.85	7239.66
212	River Channel	4.38026e+06	413406	2061.88	8397.18
213	River Channel	4.3804e+06	413421	2059.88	8249.96
222	River Channel	4.38027e+06	413410	2059.97	8386.26
223	River Channel	4.38018e+06	413402	2062.97	8426.25
224	River Channel	4.38011e+06	413202	2065.97	8612.7
247	River Channel	4.3799e+06	412985	2063	8920.44
256	River Channel	4.37969e+06	412984	2074.86	9074.05
260	River Channel	4.37959e+06	412851	2077.86	9236.82
263	River Channel	4.37966e+06	412974	2083.07	9106.35
268	River Channel	4.37962e+06	412929	2076.07	9160.84
273	River Channel	4.37953e+06	412793	2077.68	9321.29
274	River Channel	4.37947e+06	412625	2078.68	9476.87
283	River Channel	4.37936e+06	412579	2083.68	9587.13
288	River Channel	4.37711e+06	411089	2172.21	12396.3
291	River Channel	4.37695e+06	411117	2176.21	12548.7
294	River Channel	4.37684e+06	411169	2181.86	12662.5
295	River Channel	4.37665e+06	411164	2184.86	12856.5
305	River Channel	4.37656e+06	411145	2189.19	12944.2
315	River Channel	4.37737e+06	411165	2143.71	12140.7
317	River Channel	4.37734e+06	411033	2154.71	12173.1
354	River Channel	4.37771e+06	411311	2141.91	11773.2
357	River Channel	4.37758e+06	411288	2147.31	11907.2
360	River Channel	4.37811e+06	411503	2132.17	11314.2
364	River Channel	4.37813e+06	411518	2134.77	11292.8
366	River Channel	4.37819e+06	411551	2132.77	11229.5
372	River Channel	4.37835e+06	411737	2118.86	10990.7
373	River Channel	4.37844e+06	411904	2106.48	10800.6
382	River Channel	4.37743e+06	411249	2139.41	12059.7
383	River Channel	4.37738e+06	411169	2145.41	12137.8
439	River Channel	4.38612e+06	416222	1959.58	1689.05
440	River Channel	4.38602e+06	416114	1964.58	1825.78
441	River Channel	4.38602e+06	416082	1965.58	1849.99
442	River Channel	4.38592e+06	415935	1970.58	2027.31
467	River Channel	4.37072e+06	412402	2303.23	19763.1
468	River Channel	4.37082e+06	412417	2301.23	19724.5
476	River Channel	4.37102e+06	412248	2297.39	19477.8
477	River Channel	4.37099e+06	412128	2294.39	19389.7
486	River Channel	4.37104e+06	412044	2295.52	19222.9
487	River Channel	4.37117e+06	412041	2290.52	19092
488	River Channel	4.37112e+06	412033	2292.52	19137.1
489	River Channel	4.37127e+06	412039	2288.52	18985.8
498	River Channel	4.37172e+06	412004	2283.11	18542
499	River Channel	4.37167e+06	411963	2284.11	18587.4
500	River Channel	4.37143e+06	411989	2285.11	18834.8
501	River Channel	4.37136e+06	412027	2286.11	18897.5
502	River Channel	4.37132e+06	412039	2287.11	18944.5
514	River Channel	4.37167e+06	411962	2285.97	18591.5
515	River Channel	4.37176e+06	412055	2282.97	18503
516	River Channel	4.37183e+06	412132	2280.97	18426.4
521	River Channel	4.37192e+06	412102	2276.97	18352
522	River Channel	4.372e+06	412066	2275.97	18299.9
532	River Channel	4.37204e+06	412007	2273.05	18234.9
533	River Channel	4.37206e+06	411951	2272.05	18191.5
538	River Channel	4.37214e+06	411822	2272.25	18054.7
541	River Channel	4.37221e+06	411737	2271.96	17952.5
542	River Channel	4.37226e+06	411719	2272.96	17902.9
543	River Channel	4.37222e+06	411733	2272.5	17945
544	River Channel	4.3723e+06	411715	2271.5	17860.1
555	River Channel	4.37247e+06	411698	2268.57	17708.2
556	River Channel	4.37241e+06	411706	2269.57	17760.4
559	River Channel	4.37273e+06	411533	2265.14	17390.1
565	River Channel	4.37253e+06	411680	2267.83	17650.5
568	River Channel	4.37259e+06	411634	2265.83	17573.6
569	River Channel	4.37262e+06	411636	2264.83	17544.7
571	River Channel	4.37284e+06	411115	2250.38	16959.8
572	River Channel	4.37278e+06	411164	2251.38	17026.4
573	River Channel	4.37274e+06	411247	2253.38	17117.6
579	River Channel	4.37273e+06	411520	2265.78	17378.1
580	River Channel	4.3727e+06	411408	2262.78	17284.6
581	River Channel	4.37274e+06	411279	2261.78	17150.5
582	River Channel	4.37279e+06	411160	2258.78	17021
599	River Channel	4.37366e+06	410546	2241.18	15957.7
600	River Channel	4.37375e+06	410594	2240.18	15886.8
606	River Channel	4.37343e+06	410621	2246.44	16196.8
607	River Channel	4.37352e+06	410590	2245.44	16102.3
608	River Channel	4.37326e+06	410681	2248.44	16378.6
615	River Channel	4.37326e+06	410676	2250.78	16373.3
617	River Channel	4.37311e+06	410778	2253.78	16548.3
618	River Channel	4.37312e+06	410770	2251.98	16541.5
624	River Channel	4.37306e+06	410852	2256.68	16621.5
625	River Channel	4.37298e+06	410877	2257.18	16707
626	River Channel	4.3729e+06	410890	2259.18	16728.3
627	River Channel	4.37283e+06	410970	2260.18	16827.1
635	River Channel	4.37389e+06	410716	2236.13	15698.4
636	River Channel	4.37395e+06	410799	2236.13	15610.6
637	River Channel	4.37402e+06	410901	2236.13	15498.6
644	River Channel	4.37405e+06	410917	2232.1	15464.4
645	River Channel	4.37417e+06	410917	2230.1	15358.9
659	River Channel	4.37614e+06	411119	2195.49	13374.4
668	River Channel	4.37608e+06	411017	2196.17	13482.9
669	River Channel	4.37599e+06	410894	2199.17	13589.1
674	River Channel	4.376e+06	410883	2193.8	13587.4
675	River Channel	4.3759e+06	410919	2196.8	13675
676	River Channel	4.37584e+06	410937	2197.8	13736.7
683	River Channel	4.37579e+06	410930	2201.86	13783.9
684	River Channel	4.37575e+06	410924	2203.86	13825.3
685	River Channel	4.37555e+06	410921	2206.86	14018.5
694	River Channel	4.37555e+06	410916	2205.61	14025.5
701	River Channel	4.37643e+06	411183	2187.26	13093
702	River Channel	4.37638e+06	411181	2188.26	13140.3
713	River Channel	4.37523e+06	410996	2210.51	14341.9
714	River Channel	4.37531e+06	410926	2209.51	14259.7
721	River Channel	4.37505e+06	411019	2212.45	14520.3
722	River Channel	4.375e+06	411003	2213.45	14573.3
724	River Channel	4.37493e+06	410971	2214.95	14640.3
730	River Channel	4.37493e+06	410840	2217.45	14648.2
734	River Channel	4.37478e+06	410786	2219.31	14808.4
736	River Channel	4.37473e+06	410870	2220.31	14845.9
741	River Channel	4.37464e+06	410892	2221.31	14932.4
747	River Channel	4.37461e+06	410894	2223.26	14967.8
748	River Channel	4.37449e+06	410819	2225.26	15091.7
749	River Channel	4.37444e+06	410768	2226.26	15147.9
761	River Channel	4.37429e+06	410780	2228	15296.9
762	River Channel	4.37416e+06	410919	2229	15366.7
780	River Channel	4.37868e+06	412220	2103.53	10382.5
782	River Channel	4.37878e+06	412292	2098.63	10259.7
788	River Channel	4.37897e+06	412326	2100.63	10073.2
807	River Channel	4.37909e+06	412303	2097.68	9957.51
808	River Channel	4.37923e+06	412370	2094.68	9824.87
813	River Channel	4.37931e+06	412496	2087.68	9679.32
819	River Channel	4.37863e+06	412203	2103.53	10426.9
827	River Channel	4.37855e+06	411980	2111.61	10675.4
842	River Channel	4.37069e+06	412418	2304.89	19789.6
850	River Channel	4.37062e+06	412614	2305.89	19996.7
852	River Channel	4.37067e+06	412682	2306.01	20030.7
853	River Channel	4.37054e+06	412748	2308.01	20154.2
862	River Channel	4.37063e+06	413226	2313.65	20519.7
863	River Channel	4.37071e+06	413056	2312.97	20329.8
864	River Channel	4.37051e+06	413425	2315.65	20752.6
865	River Channel	4.37042e+06	413595	2316.65	20942.7
874	River Channel	4.36995e+06	414097	2326.12	21614
877	River Channel	4.37017e+06	413994	2323.12	21413.8
883	River Channel	4.36996e+06	414095	2324.76	21605.9
884	River Channel	4.36985e+06	414201	2328.76	21757.2
894	River Channel	4.36977e+06	414235	2327.78	21822.3
904	River Channel	4.36958e+06	414693	2329.65	22317.3
905	River Channel	4.36938e+06	414849	2335.65	22549.4
906	River Channel	4.36928e+06	415043	2335.65	22768.4
907	River Channel	4.36925e+06	415147	2341.93	22873.9
908	River Channel	4.36911e+06	415337	2344.93	23110.5
919	River Channel	4.36898e+06	415401	2343	23231.4
920	River Channel	4.3689e+06	415559	2344	23407.3
930	River Channel	4.36887e+06	415595	2347.95	23453.6
931	River Channel	4.36876e+06	415688	2348.95	23586.7
932	River Channel	4.36876e+06	415837	2350.95	23717.3
941	River Channel	4.36872e+06	415890	2351.68	23781.9
942	River Channel	4.36859e+06	415932	2354.68	23902.8
948	River Channel	4.36838e+06	415872	2356.32	24122.3
954	River Channel	4.36835e+06	415871	2362.79	24151.6
955	River Channel	4.36815e+06	415898	2360.29	24336.1
964	River Channel	4.36776e+06	415781	2366.26	24739.2
965	River Channel	4.3676e+06	415765	2367.26	24899.9
968	River Channel	4.36775e+06	415783	2366.8	24753.5
969	River Channel	4.36757e+06	415757	2368.8	24937.9
970	River Channel	4.36749e+06	415751	2369.8	25010.1
979	River Channel	4.36734e+06	415665	2374.85	25180.9
980	River Channel	4.3673e+06	415647	2374.8	25221.7
989	River Channel	4.36716e+06	415576	2374.06	25374
990	River Channel	4.36706e+06	415527	2376.06	25483
996	River Channel	4.36697e+06	415512	2373.95	25568.2
997	River Channel	4.36691e+06	415587	2374.95	25632.4
998	River Channel	4.36687e+06	415621	2375.95	25683.3
1008	River Channel	4.36674e+06	415641	2374.91	25816.2
1009	River Channel	4.36667e+06	415691	2376.91	25889
1010	River Channel	4.36664e+06	415769	2377.91	25931.9
1011	River Channel	4.36648e+06	415782	2385.08	26095.3
1012	River Channel	4.36635e+06	415796	2386.08	26228.6
1016	River Channel	4.36627e+06	415818	2386.33	26304
1017	River Channel	4.36615e+06	415860	2387.33	26433.8
1020	River Channel	4.36602e+06	415846	2390.63	26555
1021	River Channel	4.36594e+06	415770	2392.63	26617.2
1022	River Channel	4.36587e+06	415738	2393.63	26675
1026	River Channel	4.36564e+06	415953	2397.23	26969.2
1027	River Channel	4.36555e+06	415943	2399.23	27049.3
1029	River Channel	4.36542e+06	415956	2400.23	27175.5
1034	River Channel	4.36533e+06	415974	2401.89	27270.2
1035	River Channel	4.36518e+06	416049	2405.89	27437.6
1036	River Channel	4.36509e+06	416077	2407.89	27531.7
1037	River Channel	4.36499e+06	416077	2409.89	27625.6
1041	River Channel	4.36494e+06	416082	2414.89	27669.4
1042	River Channel	4.36479e+06	416162	2417.89	27841.5
1043	River Channel	4.36471e+06	416153	2418.89	27937.1
1049	River Channel	4.36454e+06	415952	2420.64	28181
1050	River Channel	4.36443e+06	415980	2422.64	28264.6
1051	River Channel	4.36426e+06	415971	2423.64	28426.2
1058	River Channel	4.36427e+06	415973	2433.32	28411.9
1059	River Channel	4.36422e+06	415959	2428.32	28464
1060	River Channel	4.36412e+06	415912	2432.32	28576
1061	River Channel	4.36402e+06	415810	2433.32	28680.9
1066	River Channel	4.36371e+06	415847	2440.76	28983.1
1075	River Channel	4.3638e+06	415739	2431.04	28910
1076	River Channel	4.36363e+06	415882	2437.04	29060.2
1082	River Channel	4.3636e+06	415881	2438.66	29091.2
1083	River Channel	4.36347e+06	415903	2441.66	29212.7
1084	River Channel	4.36335e+06	415901	2442.16	29337.5
1092	River Channel	4.3632e+06	415824	2444.81	29488.1
1100	River Channel	4.36313e+06	415785	2446.46	29561.1
1101	River Channel	4.36298e+06	415705	2448.46	29728.3
1102	River Channel	4.36295e+06	415624	2449.46	29808.5
1107	River Channel	4.36294e+06	415600	2447.3	29828.3
1108	River Channel	4.3629e+06	415527	2448.3	29905.4
1112	River Channel	4.36275e+06	415404	2450.33	30111.8
1116	River Channel	4.36271e+06	415386	2452.67	30142.4
1117	River Channel	4.36255e+06	415395	2454.67	30296.9
1118	River Channel	4.36249e+06	415382	2455.67	30359.2
1128	River Channel	4.36227e+06	415387	2460.85	30566.6
1129	River Channel	4.36219e+06	415402	2461.85	30654.1
1130	River Channel	4.36211e+06	415418	2462.35	30731.2
1134	River Channel	4.362e+06	415526	2463.64	30869.5
1135	River Channel	4.36187e+06	415643	2466.64	31018.5
1136	River Channel	4.36171e+06	415654	2468.64	31150.3
1142	River Channel	4.36158e+06	415524	2465.9	31330.2
1143	River Channel	4.36157e+06	415421	2467.9	31408.1
1150	River Channel	4.36163e+06	415313	2470.68	31432.5
1151	River Channel	4.36165e+06	415209	2473.18	31484.8
1152	River Channel	4.36158e+06	415185	2474.68	31558.2
1157	Strath	4.3617e+06	415122	2484.68	31502.4
1158	River Channel	4.36156e+06	415181	2470.61	31574.1
1159	River Channel	4.36145e+06	415150	2473.01	31678.6
1160	River Channel	4.36135e+06	415127	2473.61	31765.8
1167	River Channel	4.36134e+06	415125	2477.81	31774.4
1168	River Channel	4.36118e+06	415066	2480.31	31905.8
1176	River Channel	4.36114e+06	414848	2487.37	32126.8
1177	River Channel	4.36112e+06	414998	2485.37	31980.4
1184	River Channel	4.3611e+06	414758	2489.32	32221.2
1185	River Channel	4.36111e+06	414590	2491.72	32427
1186	River Channel	4.36109e+06	414505	2492.32	32501
1189	River Channel	4.3611e+06	414580	2488.15	32436.6
1190	River Channel	4.36106e+06	414446	2491.15	32567.1
1191	River Channel	4.36092e+06	414329	2492.15	32747.5
1192	River Channel	4.3609e+06	414320	2488.84	32766.1
1193	River Channel	4.36082e+06	414245	2490.84	32858.7
1194	River Channel	4.36081e+06	414144	2491.84	32957.2
1195	River Channel	4.3608e+06	414072	2492.84	33028.7
1196	River Channel	4.3608e+06	414017	2493.84	33080.4
1197	Strath	4.36077e+06	414087	2517.34	33021.9
1198	River Channel	4.3608e+06	414066	2493.93	33034.7
1199	River Channel	4.36079e+06	414007	2495.93	33092.4
1200	River Channel	4.36065e+06	413928	2499.24	33209.9
1201	River Channel	4.36066e+06	413785	2501.74	33343.6
1202	River Channel	4.36069e+06	413715	2503.24	33401.7
1206	River Channel	4.36069e+06	413707	2500.77	33409.8
1207	River Channel	4.36067e+06	413597	2502.77	33518.7
1208	River Channel	4.36063e+06	413564	2503.27	33580.2
1212	River Channel	4.36034e+06	413072	2512.03	34121.5
1213	River Channel	4.36043e+06	413222	2509.53	33949.8
1216	River Channel	4.36049e+06	413346	2507.44	33826.9
1217	River Channel	4.36051e+06	413401	2506.94	33776
1218	River Channel	4.36054e+06	413471	2506.24	33707
1229	River Channel	4.36032e+06	413021	2509.41	34168.8
1230	River Channel	4.36019e+06	412914	2512.91	34336.3
1231	River Channel	4.36011e+06	412937	2513.41	34374
1233	River Channel	4.35995e+06	413030	2516.86	34460.8
1239	River Channel	4.35965e+06	412904	2521.3	34782.1
1244	River Channel	4.35949e+06	412695	2523.22	35034.2
1248	River Channel	4.35939e+06	412575	2524.45	35182.5
1249	River Channel	4.35931e+06	412574	2526.45	35248.6
1254	River Channel	4.35824e+06	411297	2555.22	36972.6
1257	River Channel	4.35843e+06	411532	2549.51	36669.2
1262	River Channel	4.35859e+06	411600	2545.51	36523.5
1263	River Channel	4.35863e+06	411611	2546.75	36493
1264	River Channel	4.3587e+06	411628	2540.66	36440.1
1265	River Channel	4.35874e+06	411656	2543.75	36396.6
1273	River Channel	4.35877e+06	411730	2542.66	36330
1274	River Channel	4.35875e+06	411662	2543.16	36387.6
1282	River Channel	4.3591e+06	412360	2532.24	35545.5
1283	River Channel	4.35876e+06	411857	2535.41	36214.8
1291	River Channel	4.35887e+06	412079	2532.91	35966.3
1299	River Channel	4.3583e+06	411258	2557.31	36973.5
1300	River Channel	4.35835e+06	411125	2558.81	37055.4
1306	River Channel	4.35804e+06	410942	2567.61	37415.3
1307	River Channel	4.35779e+06	410794	2569.95	37706.9
1308	River Channel	4.35764e+06	410665	2572.45	37896.9
1310	River Channel	4.35736e+06	410491	2572.92	38218.8
1315	River Channel	4.35704e+06	410457	2576.17	38547.1
1316	River Channel	4.35676e+06	410464	2577.4	38818.4
1320	River Channel	4.35664e+06	410473	2583.69	38902.1
1322	River Channel	4.35648e+06	410351	2583.37	39096.6
1323	River Channel	4.35643e+06	410256	2585.87	39193.2
1324	River Channel	4.35639e+06	410192	2586.87	39262.7
1338	River Channel	4.35624e+06	410114	2587.31	39425.8
1339	River Channel	4.35609e+06	410006	2592.36	39614.4
1340	River Channel	4.35601e+06	409972	2592.86	39701.9
1341	River Channel	4.35594e+06	409948	2593.36	39768.1
1345	River Channel	4.35584e+06	409686	2597.89	40043.8
1346	River Channel	4.35589e+06	409654	2599.04	40068.8
1347	River Channel	4.35598e+06	409603	2600.54	40106.7
1352	River Channel	4.35596e+06	409477	2601.18	40233.6
1353	River Channel	4.35594e+06	409396	2602.18	40316.6
1354	River Channel	4.35581e+06	409245	2605.64	40484.9
1355	River Channel	4.35565e+06	409119	2611.77	40726.3
1364	River Channel	4.35551e+06	409076	2608.07	40868.8
1366	River Channel	4.35528e+06	409062	2608.22	41097.8
1367	River Channel	4.35513e+06	409050	2610.22	41247
1370	River Channel	4.35497e+06	408998	2614.22	41408
1371	River Channel	4.35506e+06	409033	2612.22	41314.9
1372	River Channel	4.35487e+06	408924	2616.61	41521
1373	River Channel	4.35481e+06	408880	2618.61	41581.4
1374	River Channel	4.35471e+06	408856	2621.11	41687.9
1378	River Channel	4.35453e+06	408948	2625.58	41859.1
1379	River Channel	4.3544e+06	408979	2626.08	41976.3
1380	River Channel	4.35437e+06	408982	2625.02	42014.8
1381	River Channel	4.35424e+06	408964	2628.52	42145.7
1382	River Channel	4.35399e+06	408892	2627.06	42396
1383	River Channel	4.35392e+06	408858	2628.06	42477.5
1384	River Channel	4.3536e+06	408666	2632.46	42836.4
1385	River Channel	4.35341e+06	408556	2634.16	42970.7
1386	River Channel	4.35331e+06	408616	2635.16	43062
1391	River Channel	4.35328e+06	408639	2647.5	43099.8
1392	River Channel	4.35323e+06	408667	2648	43153.4
1393	River Channel	4.35312e+06	408781	2649	43302.1
1398	River Channel	4.35293e+06	408967	2638.79	43558
1399	River Channel	4.35265e+06	409062	2644.19	43805.1
1400	River Channel	4.35263e+06	409040	2644.6	43836.5
1401	River Channel	4.35256e+06	408935	2645.9	43959.2
1402	River Channel	4.35252e+06	408852	2646.6	44050.6
1409	River Channel	4.3524e+06	408779	2649.81	44218.6
1410	River Channel	4.35228e+06	408746	2650.61	44339
1411	River Channel	4.35203e+06	408797	2649.54	44588.7
1412	River Channel	4.35183e+06	408757	2653.04	44790.4
1413	River Channel	4.35128e+06	408736	2660.07	45342.5
