# Supplementary material for: Rapid Holocene bedrock canyon incision of Beida River, North Qilian Shan, China
Source: Copernicus journal article supplement (doi:10.5194/esurf-2021-48), 2021-07-12
Supplement: Supplementary file 2 [file esurf-2021-48-supplement.zip › YiranWang_BDRiverKZ_Table S2.xlsx]

## Sheet: Sheet1
Id	Distance (from mountain front; m)	Present channel width (m)	Paleo-channel width (m)	Patch	Image
57	0	27	N/A	3	2016-08-11
58	100	102	N/A	3	2016-08-11
59	200	108	N/A	3	2016-08-11
60	300	94	N/A	3	2016-08-11
61	400	35	N/A	3	2016-08-11
62	500	34	N/A	3	2016-08-11
63	600	36	N/A	3	2016-08-11
64	700	35	N/A	3	2016-08-11
65	800	37	N/A	3	2016-08-11
66	900	34	N/A	3	2016-08-11
67	1000	29	N/A	3	2016-08-11
68	1100	32	N/A	3	2016-08-11
69	1200	41	N/A	3	2016-08-11
70	1300	30	N/A	3	2016-08-11
71	1400	27	N/A	3	2016-08-11
72	1500	22	N/A	3	2016-08-11
73	1600	29	N/A	3	2016-08-11
74	1700	31	N/A	3	2016-08-11
75	1800	23	N/A	3	2016-08-11
76	1900	20	N/A	3	2016-08-11
77	2000	15	N/A	3	2016-08-11
78	2100	25	N/A	3	2016-08-11
79	2200	21	N/A	3	2016-08-11
80	2300	24	N/A	3	2016-08-11
81	2400	25	N/A	3	2016-08-11
82	2500	25	N/A	3	2016-08-11
83	2600	44	N/A	3	2016-08-11
84	2700	55	N/A	3	2016-08-11
95	3800	26	N/A	3	2012-07-12
96	3900	52	N/A	3	2012-07-12
97	4000	64	N/A	3	2012-07-12
98	4100	43	N/A	3	2012-07-12
99	4200	40	N/A	3	2012-07-12
100	4300	34	N/A	3	2012-07-12
101	4400	44	N/A	3	2012-07-12
102	4500	30	N/A	3	2012-07-12
103	4600	31	N/A	3	2012-07-12
104	4700	19	N/A	3	2012-07-12
105	4800	31	N/A	3	2012-07-12
106	4900	24	N/A	3	2012-07-12
107	5000	25	N/A	3	2012-07-12
108	5100	25	N/A	3	2012-07-12
109	5200	23	N/A	3	2012-07-12
110	5300	26	N/A	3	2012-07-12
111	5400	25	N/A	3	2012-07-12
112	5500	19	N/A	3	2012-07-12
113	5600	22	N/A	3	2012-07-12
114	5700	17	N/A	3	2012-07-12
115	5800	20	N/A	3	2012-07-12
116	5900	25	N/A	3	2012-07-12
117	6000	21	N/A	3	2012-07-12
118	6100	20	N/A	3	2012-07-12
119	6200	17	N/A	3	2012-07-12
120	6300	28	N/A	3	2012-07-12
121	6400	24	N/A	3	2012-07-12
122	6500	21	N/A	3	2012-07-12
123	6600	14	N/A	3	2012-07-12
124	6700	20	N/A	3	2012-07-12
125	6800	14	N/A	3	2012-07-12
126	6900	32	N/A	3	2012-07-12
127	7000	23	N/A	3	2012-07-12
128	7100	24	N/A	3	2012-07-12
129	7200	22	N/A	3	2012-07-12
130	7300	27	N/A	3	2012-07-12
131	7400	24	N/A	3	2012-07-12
132	7500	40	N/A	3	2012-07-12
133	7600	70	N/A	3	2012-07-12
134	7700	33	N/A	3	2012-07-12
135	7800	23	N/A	3	2012-07-12
136	7900	34	N/A	3	2012-07-12
137	8000	27	N/A	3	2012-07-12
138	8100	25	N/A	3	2012-07-12
139	8200	22	N/A	3	2012-07-12
140	8300	25	N/A	3	2012-07-12
141	8400	19	N/A	3	2012-07-12
142	8500	10	N/A	3	2012-07-12
143	8600	15	N/A	3	2012-07-12
144	8700	26	N/A	3	2012-07-12
145	8800	17	N/A	3	2012-07-12
146	8900	19	N/A	3	2012-07-12
147	9000	18	N/A	3	2012-07-12
148	9100	21	N/A	3	2012-07-12
149	9200	20	N/A	3	2012-07-12
150	9300	13	N/A	3	2012-07-12
151	9400	18	N/A	3	2012-07-12
152	9500	21	N/A	3	2012-07-12
153	9600	21	N/A	3	2012-07-12
154	9700	16	N/A	3	2012-07-12
155	9800	18	N/A	3	2012-07-12
156	9900	12	N/A	3	2012-07-12
157	10000	18	N/A	2	2012-07-12
158	10100	18	N/A	2	2012-07-12
159	10200	28	N/A	2	2012-07-12
160	10300	24	N/A	2	2012-07-12
161	10400	25	N/A	2	2012-07-12
162	10500	21	N/A	2	2012-07-12
163	10600	8	N/A	2	2012-07-12
164	10700	14	N/A	2	2012-07-12
165	10800	16	N/A	2	2012-07-12
166	10900	14	N/A	2	2012-07-12
167	11000	11	N/A	2	2012-07-12
168	11100	17	N/A	2	2012-07-12
169	11200	16	N/A	2	2012-07-12
170	11300	18	N/A	2	2012-07-12
171	11400	20	N/A	2	2012-07-12
172	11500	17	N/A	2	2012-07-12
173	11600	14	N/A	2	2012-07-12
174	11700	21	N/A	2	2012-07-12
175	11800	17	N/A	2	2012-07-12
176	11900	23	N/A	2	2012-07-12
177	12000	10	N/A	2	2012-07-12
178	12100	12	N/A	2	2012-07-12
179	12200	29	N/A	2	2012-07-12
180	12300	13	N/A	2	2012-07-12
181	12400	13	N/A	2	2012-07-12
182	12500	23	N/A	2	2012-07-12
183	12600	19	N/A	2	2012-07-12
184	12700	22	N/A	2	2012-07-12
185	12800	27	N/A	2	2012-07-12
186	12900	14	N/A	2	2012-07-12
187	13000	15	N/A	1	2012-07-12
188	13100	26	N/A	1	2012-07-12
189	13200	8	N/A	1	2012-07-12
190	13300	16	N/A	1	2012-07-12
191	13400	16	N/A	1	2012-07-12
192	13500	12	N/A	1	2012-07-12
193	13600	24	N/A	1	2012-07-12
194	13700	18	N/A	1	2012-07-12
195	13800	13	N/A	1	2012-07-12
196	13900	20	N/A	1	2012-07-12
197	14000	18	N/A	1	2012-07-12
198	14100	12	N/A	1	2012-07-12
199	14200	20	N/A	1	2012-07-12
200	14300	17	N/A	1	2012-07-12
201	14400	23	N/A	1	2012-07-12
202	14500	15	N/A	1	2012-07-12
203	14600	9	N/A	1	2012-07-12
204	14700	14	N/A	1	2012-07-12
205	14800	13	N/A	1	2012-07-12
206	14900	17	N/A	1	2012-07-12
207	15000	11	N/A	1	2012-07-12
208	15100	16	N/A	1	2012-07-12
209	15200	20	N/A	1	2012-07-12
210	15300	9	N/A	1	2012-07-12
211	15400	12	N/A	1	2012-07-12
212	15500	14	N/A	1	2012-07-12
213	15600	19	N/A	1	2012-07-12
214	15700	18	N/A	1	2012-07-12
215	15800	14	N/A	1	2012-07-12
216	15900	16	N/A	1	2012-07-12
217	16000	17	N/A	1	2012-07-12
218	16100	15	N/A	1	2012-07-12
219	16200	16	N/A	1	2012-07-12
220	16300	11	N/A	1	2012-07-12
221	16400	19	N/A	1	2012-07-12
222	16500	18	N/A	1	2012-07-12
223	16600	18	N/A	1	2012-07-12
224	16700	25	N/A	1	2012-07-12
225	16800	22	N/A	1	2012-07-12
226	16900	20	N/A	1	2012-07-12
227	17000	22	N/A	1	2012-07-12
228	17100	22	N/A	1	2012-07-12
229	17200	25	N/A	1	2012-07-12
230	17300	19	N/A	1	2012-07-12
231	17400	15	N/A	1	2012-07-12
232	17500	23	N/A	1	2012-07-12
233	17600	23	N/A	1	2012-07-12
234	17700	21	N/A	1	2012-07-12
235	17800	29	N/A	1	2012-07-12
236	17900	44	N/A	1	2012-07-12
237	18000	20	N/A	1	2012-07-12
238	18100	20	N/A	1	2012-07-12
239	18200	24	N/A	1	2012-07-12
240	18300	29	N/A	1	2012-07-12
241	18400	39	N/A	1	2012-07-12
242	18500	27	N/A	1	2012-07-12
243	18600	24	N/A	1	2012-07-12
244	18700	26	N/A	1	2012-07-12
245	18800	18	N/A	1	2012-07-12
246	18900	10	N/A	1	2012-07-12
247	19000	13	N/A	1	2012-07-12
248	19100	12	N/A	1	2012-07-12
249	19200	13	N/A	1	2012-07-12
250	19300	13	N/A	1	2012-07-12
251	19400	13	N/A	1	2012-07-12
252	19500	14	N/A	1	2012-07-12
253	19600	13	N/A	1	2012-07-12
254	19700	20	N/A	1	2012-07-12
255	19800	18	N/A	1	2012-07-12
256	19900	24	N/A	1	2012-07-12
257	20000	28	N/A	1	2012-07-12
258	20100	38	N/A	1	2012-07-12
259	20200	62	N/A	1	2012-07-12
260	20300	28	N/A	1	2012-07-12
261	20400	33	N/A	1	2012-07-12
262	20500	31	N/A	1	2012-07-12
263	20600	29	N/A	1	2012-07-12
264	20700	33	N/A	1	2012-07-12
265	20800	42	N/A	1	2012-07-12
266	20900	45	N/A	1	2012-07-12
267	21000	25	N/A	1	2012-07-12
268	21100	25	N/A	1	2012-07-12
269	21200	26	N/A	1	2012-07-12
270	21300	39	N/A	1	2012-07-12
271	21400	53	N/A	0	2012-07-12
272	21500	36	N/A	0	2012-07-12
273	21600	27	N/A	0	2012-07-12
274	21700	32	N/A	0	2012-07-12
275	21800	29	N/A	0	2012-07-12
276	21900	41	N/A	0	2012-07-12
277	22000	39	N/A	0	2012-07-12
278	22100	31	N/A	0	2012-07-12
279	22200	36	N/A	0	2012-07-12
280	22300	26	N/A	0	2012-07-12
281	22400	23	N/A	0	2012-07-12
282	22500	29	N/A	0	2012-07-12
283	22600	43	N/A	0	2012-07-12
284	22700	56	N/A	0	2012-07-12
285	22800	56	N/A	0	2012-07-12
286	22900	53	N/A	0	2012-07-12
287	23000	82	N/A	0	2010-10-26
288	23100	75	N/A	0	2010-10-26
289	23200	108	N/A	0	2010-10-26
290	23300	136	N/A	0	2010-10-26
291	23400	141	N/A	0	2010-10-26
292	23500	130	N/A	0	2010-10-26
293	23600	122	N/A	0	2010-10-26
294	23700	108	N/A	0	2010-10-26
295	23800	40	N/A	0	2010-10-26
296	23900	28	N/A	0	2010-10-26
297	24000	20	N/A	0	2016-08-11
298	24100	26	N/A	0	2016-08-11
299	24200	51	N/A	0	2016-08-11
300	24300	81	N/A	0	2016-08-11
302	24500	66	N/A	0	2016-08-11
303	24600	41	N/A	0	2016-08-11
304	24700	67	N/A	0	2016-08-11
305	24800	89	N/A	0	2016-08-11
306	24900	51	N/A	0	2016-08-11
307	25000	82	N/A	0	2016-08-11
308	25100	87	N/A	0	2016-08-11
309	25200	68	N/A	0	2016-08-11
310	25300	91	N/A	0	2016-08-11
311	25400	86	N/A	0	2016-08-11
312	25500	67	N/A	0	2016-08-11
313	25600	55	N/A	0	2016-08-11
314	25700	77	N/A	0	2016-08-11
315	25800	49	N/A	0	2016-08-11
316	25900	42	N/A	0	2016-08-11
317	26000	50	N/A	0	2016-08-11
318	26100	37	N/A	0	2016-08-11
319	26200	47	N/A	0	2016-08-11
320	26300	47	N/A	0	2016-08-11
321	26400	49	N/A	0	2016-08-11
322	26500	100	N/A	0	2016-08-11
323	26600	101	N/A	0	2016-08-11
324	26700	88	N/A	0	2016-08-11
325	26800	72	N/A	0	2016-08-11
326	26900	91	N/A	0	2016-08-11
327	27000	89	N/A	0	2016-08-11
328	27100	83	N/A	0	2016-08-11
329	27200	84	N/A	0	2016-08-11
330	27300	72	N/A	0	2016-08-11
331	27400	52	N/A	0	2016-08-11
332	27500	59	N/A	0	2016-08-11
333	27600	78	N/A	0	2016-08-11
334	27700	32	N/A	0	2016-08-11
335	27800	31	N/A	0	2016-08-11
336	27900	75	N/A	0	2016-08-11
337	28000	94	N/A	0	2016-08-11
338	28100	85	N/A	0	2016-08-11
339	28200	60	N/A	0	2016-08-11
340	28300	36	N/A	0	2011-07-18
341	28400	90	N/A	0	2011-07-18
342	28500	106	N/A	0	2011-07-18
343	28600	89	N/A	0	2011-07-18
344	28700	70	N/A	0	2011-07-18
345	28800	48	N/A	0	2011-07-18
346	28900	65	N/A	0	2011-07-18
347	29000	81	N/A	0	2011-07-18
348	29100	75	N/A	0	2011-07-18
349	29200	104	N/A	0	2011-07-18
350	29300	89	N/A	0	2011-07-18
351	29400	68	N/A	0	2011-07-18
352	29500	27	N/A	0	2011-07-18
353	29600	21	N/A	0	2011-07-18
354	29700	13	N/A	0	2011-07-18
355	29800	10	N/A	0	2011-07-18
356	29900	15	N/A	0	2011-07-18
357	30000	21	N/A	0	2011-07-18
358	30100	28	N/A	0	2011-07-18
359	30200	56	N/A	0	2011-07-18
360	30300	44	N/A	0	2011-07-18
361	30400	28	N/A	0	2011-07-18
362	30500	22	N/A	0	2011-07-18
363	30600	35	N/A	0	2011-07-18
364	30700	39	N/A	0	2011-07-18
365	30800	51	N/A	0	2011-07-18
366	30900	44	N/A	0	2011-07-18
367	31000	37	N/A	0	2011-07-18
368	31100	44	N/A	0	2011-07-18
369	31200	69	N/A	0	2011-07-18
370	31300	77	N/A	0	2011-07-18
371	31400	29	N/A	0	2011-07-18
372	31500	49	N/A	0	2011-07-18
373	31600	56	N/A	0	2011-07-18
374	31700	24	N/A	0	2011-07-18
375	31800	33	N/A	0	2011-07-18
376	31900	33	N/A	0	2011-07-18
377	32000	45	N/A	0	2011-07-18
378	32100	48	N/A	0	2011-07-18
379	32200	37	N/A	0	2011-07-18
380	32300	24	N/A	0	2011-07-18
381	32400	27	N/A	0	2011-07-18
382	32500	19	N/A	0	2011-07-18
383	32600	17	N/A	0	2011-07-18
384	32700	20	N/A	0	2011-07-18
385	32800	23	N/A	0	2011-07-18
386	32900	18	N/A	0	2011-07-18
387	33000	24	N/A	0	2011-07-18
388	33100	27	N/A	0	2011-07-18
389	33200	34	N/A	0	2011-07-18
390	33300	29	N/A	0	2011-07-18
391	33400	22	N/A	0	2011-07-18
392	33500	28	N/A	0	2011-07-18
393	33600	30	N/A	0	2011-07-18
394	33700	21	N/A	0	2011-07-18
395	33800	38	N/A	0	2011-07-18
396	33900	34	N/A	0	2011-07-18
397	34000	50	N/A	0	2011-07-18
398	34100	41	N/A	0	2011-07-18
399	34200	27	N/A	0	2011-07-18
400	34300	27	N/A	0	2011-07-18
401	34400	30	N/A	0	2011-07-18
402	34500	33	N/A	0	2011-07-18
403	34600	33	N/A	0	2011-07-18
404	34700	25	N/A	0	2011-07-18
405	34800	36	N/A	0	2011-07-18
406	34900	47	N/A	0	2011-07-18
407	35000	39	N/A	0	2011-07-18
408	35100	42	N/A	0	2011-07-18
409	35200	44	N/A	0	2011-07-18
410	35300	38	N/A	0	2011-07-18
411	35400	33	N/A	0	2011-07-18
412	35500	31	N/A	0	2011-07-18
413	35600	28	N/A	0	2010-05-22
414	35700	25	N/A	0	2010-05-22
415	35800	25	N/A	0	2010-05-22
416	35900	29	N/A	0	2010-05-22
417	36000	15	N/A	0	2010-05-22
418	36100	33	N/A	0	2010-05-22
419	36200	18	N/A	0	2010-05-22
420	36300	31	N/A	0	2010-05-22
421	36400	37	N/A	0	2010-05-22
422	36500	19	N/A	0	2010-05-22
423	36600	22	N/A	0	2010-05-22
424	36700	28	N/A	0	2010-05-22
425	36800	60	N/A	0	2010-05-22
426	36900	41	N/A	0	2010-05-22
427	37000	36	N/A	0	2010-05-22
428	37100	37	N/A	0	2010-05-22
429	37200	32	N/A	0	2010-05-22
430	37300	50	N/A	0	2010-05-22
431	37400	39	N/A	0	2010-05-22
432	37500	24	N/A	0	2010-05-22
435	37800	20	N/A	0	2010-05-22
436	37900	30	N/A	0	2010-05-22
437	38000	28	N/A	0	2010-05-22
438	38100	40	N/A	0	2010-05-22
439	38200	37	N/A	0	2010-05-22
440	38300	40	N/A	0	2010-05-22
441	38400	33	N/A	0	2010-05-22
442	38500	33	N/A	0	2010-05-22
443	38600	50	N/A	0	2010-05-22
444	38700	23	N/A	0	2010-05-22
445	38800	21	N/A	0	2010-05-22
446	38900	19	N/A	0	2010-05-22
447	39000	59	N/A	0	2010-09-11
448	39100	89	N/A	0	2010-09-11
449	39200	60	N/A	0	2010-09-11
450	39300	44	N/A	0	2010-09-11
451	39400	33	N/A	0	2010-09-11
452	39500	46	N/A	0	2010-09-11
453	39600	35	N/A	0	2010-09-11
454	39700	41	N/A	0	2010-09-11
455	39800	47	N/A	0	2010-09-11
456	39900	25	N/A	0	2010-09-11
457	40000	30	N/A	0	2010-09-11
458	40100	29	N/A	0	2010-09-11
459	40200	26	N/A	0	2010-09-11
460	40300	26	N/A	0	2010-09-11
461	40400	32	N/A	0	2010-09-11
462	40500	33	N/A	0	2010-09-11
463	40600	37	N/A	0	2010-09-11
464	40700	32	N/A	0	2010-09-11
465	40800	32	N/A	0	2010-09-11
469	41200	55	N/A	0	2010-09-11
470	41300	46	N/A	0	2010-09-11
471	41400	24	N/A	0	2010-09-11
472	41500	34	N/A	0	2010-09-11
473	41600	37	N/A	0	2010-09-11
474	41700	34	N/A	0	2010-09-11
475	41800	32	N/A	0	2010-09-11
476	41900	27	N/A	0	2010-09-11
477	42000	25	N/A	0	2010-09-11
478	42100	26	N/A	0	2010-09-11
479	42200	27	N/A	0	2010-09-11
480	42300	25	N/A	0	2010-09-11
481	42400	30	N/A	0	2010-09-11
482	42500	26	N/A	0	2010-09-11
483	42600	22	N/A	0	2010-09-11
484	42700	24	N/A	0	2010-09-11
485	42800	21	N/A	0	2010-09-11
486	42900	27	N/A	0	2010-09-11
487	43000	25	N/A	0	2010-09-11
488	43100	25	N/A	0	2010-09-11
489	43200	28	N/A	0	2010-09-11
490	43300	36	N/A	0	2010-09-11
491	43400	32	N/A	0	2010-09-11
492	43500	70	N/A	0	2010-09-11
493	43600	83	N/A	0	2010-09-11
494	43700	69	N/A	0	2010-09-11
495	43800	64	N/A	0	2010-09-11
496	43900	34	N/A	0	2010-09-11
497	44000	37	N/A	0	2010-09-11
498	44100	26	N/A	0	2010-09-11
499	44200	101	N/A	0	2010-09-11
500	44300	36	N/A	0	2010-09-11
501	44400	25	N/A	0	2010-09-11
502	44500	32	N/A	0	2010-09-11
503	44600	31	N/A	0	2010-09-11
504	44700	21	N/A	0	2010-09-11
505	44800	25	N/A	0	2010-09-11
506	44900	25	N/A	0	2010-09-11
507	45000	20	N/A	0	2010-09-11
508	45100	20	N/A	0	2010-09-11
509	45200	20	N/A	0	2010-09-11
510	45300	17	N/A	0	2010-09-11
511	45400	21	N/A	0	2010-09-11
512	45500	25	N/A	0	2010-09-11
513	45600	20	N/A	0	2010-09-11
514	45700	29	N/A	0	2010-09-11
515	45800	45	N/A	0	2010-09-11
516	45900	32	N/A	0	2010-09-11
517	46000	19	N/A	0	2010-09-11
518	46100	26	N/A	0	2010-09-11
519	46200	27	N/A	0	2010-09-11
520	46300	53	N/A	0	2010-09-11
521	46400	74	N/A	0	2010-09-11
522	46500	55	N/A	0	2010-09-11
523	46600	38	N/A	0	2010-09-11
524	46700	36	N/A	0	2010-09-11
525	46800	33	N/A	0	2010-09-11
526	46900	31	N/A	0	2010-09-11
527	47000	23	N/A	0	2010-09-11
528	47100	28	N/A	0	2010-09-11
529	47200	45	N/A	0	2010-09-11
530	47300	32	N/A	0	2010-09-11
531	47400	18	N/A	0	2010-09-11
532	47500	35	N/A	0	2010-09-11
533	47600	41	N/A	0	2010-09-11
